# Supplementary material
Source: publisher figshare collection journal article supplement (https://acs.figshare.com/ndownloader/files/24354013)
Supplement: Supplementary file 1 [file 24354013]

Table 1
Compound	SMILES	IC50 H2122 (uM)	IC50 H2009 (uM)	CLogP
1	COC1=CC2=C(C=C1)N=C(NC(=O)C1=CC=C(N)C=C1)S2	0.058	22	2.9
9	COC1=CC2=C(C=C1)N=C(NC(=O)C1=CC=CC=C1)S2	0.54	21	3.8
10	COC1=CC=C(C=C1)C(=O)NC1=NC2=C(S1)C=C(OC)C=C2	1.1	>50	3.9
11	COC1=CC2=C(C=C1)N=C(NC(=O)C1=CC(OC)=CC=C1)S2	0.31	21	3.9
12	COC1=CC2=C(C=C1)N=C(NC(=O)C1=CC=C(F)C=C1)S2	0.9	25	3.9
13	COC1=CC2=C(C=C1)N=C(NC(=O)C1=CC=C(C=C1)[N+]([O-])=O)S2	0.16	2.8	3.6
14	COC1=CC2=C(C=C1)N=C(NC(=O)C1=CC=C(OCC3=CC=CC=C3)C=C1)S2	0.043	17	5.6
15	COC1=CC=C2N=C(NC(=O)C3=CC=C(NC4=CC=CC=C4)C=C3)SC2=C1	0.044	8.9	5.5
16	COC1=CC=C2N=C(NC(=O)C3=CC=C(C=C3)C(=O)C3=CC=CC=C3)SC2=C1	0.008	3.2	5
17	COC1=CC=C2N=C(NC(=O)C3=CC=C(C=C3)N=[N+]=[N-])SC2=C1	0.12	>50	4.5
18	COC1=CC2=C(C=C1)N=C(NC(=O)C1=CC(C)=CC=C1)S2	1.2	25	4.3
19	[H][N+]1=CC(=CC=C1)C(=O)NC1=NC2=C(S1)C=C(OC)C=C2	1.1	37	2.6
20	COC1=CC=C2N=C(NC(=O)C3=CC=C(C=C3)C(=O)N3CCN(C)CC3)SC2=C1	>50	>50	3
21	COC1=CC=C2N=C(NC(=O)C3=CC=C(C=C3)C(=O)N3CCOCC3)SC2=C1	2.5	>50	2.6
22	COC1=CC=C2N=C(NC(=O)C3=CC=C(C=C3)C(=O)N3CCCCC3)SC2=C1	0.55	1	3.6
23	COC1=CC=C2N=C(NC(=O)C3=CC=C(C=C3)C(=O)NCC3=CC=CC=C3)SC2=C1	0.018	0.06	4.7
24	COC1=CC=C2N=C(NC(=O)C3=CC=C(C=C3)C(O)C3=CC=CC=N3)SC2=C1	0.029		2.6
25	COC1=CC=C2N=C(NC(=O)C3=CC=C(C=C3)C(=O)C3=CC=CC=N3)SC2=C1	0.022	2	4.1
26	COC1=CC=C2N=C(NC(=O)C3=CC=C(C=C3)C(=O)C3=CC=CN=C3)SC2=C1	0.023	1.1	3.7
(R)-27	COC1=CC=C2N=C(NC(=O)C3=CC=C(C=C3)[C@H](N)C3=CC=CC=C3)SC2=C1	0.011	1.1	4.1
(S)-27	COC1=CC=C2N=C(NC(=O)C3=CC=C(C=C3)[C@@H](N)C3=CC=CC=C3)SC2=C1	0.07	5.7	4.1
Figure 2
Compound	SMILES	IC50 H2122 (uM)
28	COC1=CC2=C(C=C1)N=C(NC(=O)CC1=CC=CC=C1)S2	>50
29	COC1=CC2=C(C=C1)N=C(NC(=O)CCC1=CC=CC=C1)S2	>50
30	COC1=CC=C(SCC(O)CN2C3=CC=C(Br)C=C3C3=C2C=CC(Br)=C3)C=C1	>50
Table 2
Compound	SMILES	IC50 H2122 (uM)	IC50 H2009 (uM)
31	[O-][N+](=O)C1=CC=C(C=C1)C(=O)NC1=NC2=C(S1)C=CC=C2	0.14	22
32	O=C(NC1=NC2=C(S1)C=CC=C2)C1=CC=C(C=C1)C1=CC=CC=C1	0.7	>50
33	COC1=CC=C(C=C1)C(=O)NC1=NC2=C(S1)C=CC=C2	2.6	31
34	CC1=CC=CC(=C1)C(=O)NC1=NC2=C(S1)C=CC=C2	0.73	>50
35	O=C(NC1=NC2=C(S1)C=CC=C2)C1=CC=CN=C1	0.26	>50
36	O=C(NC1=NC2=CC=CC=C2S1)C1=CC=C(C=C1)C(=O)C1=CC=CC=C1	0.009	2.4
37	O=C(NC1=NC2=CC=CC=C2N1)C1=CC=C(C=C1)C(=O)C1=CC=CC=C1	0.042	1.8
38	O=C(NC1=NC2=CC=CC=C2O1)C1=CC=C(C=C1)C(=O)C1=CC=CC=C1	43
39	O=C(NC1=NC=CS1)C1=CC=C(C=C1)C(=O)C1=CC=CC=C1	33	>50
40	O=C(NC1=NC=C(S1)C1=CC=CC=C1)C1=CC=C(C=C1)C(=O)C1=CC=CC=C1	5.8	5
41	O=C(NC1=NC(=CS1)C1=CC=CC=C1)C1=CC=C(C=C1)C(=O)C1=CC=CC=C1	4.7	14.9
42	COC1=CC=C(C=C1)C(=O)NC1=NC2=C(S1)C=CC(N)=C2	>50	>50
43	COC1=CC2=C(SC(NC(=O)C3=CC=C(C=C3)[N+]([O-])=O)=N2)C=C1	0.27	5.5
44	CCCOC1=CC=C2N=C(NC(=O)C3=CC=C(C=C3)C(=O)C3=CC=CC=C3)SC2=C1	0.1	0.05
45	BrCCCOC1=CC=C2N=C(NC(=O)C3=CC=C(C=C3)C(=O)C3=CC=CC=C3)SC2=N1	>50	>50
46	COC1=C(Br)C=C2N=C(NC(=O)C3=CC=C(C=C3)C(=O)C3=CC=CC=C3)SC2=C1	0.61	6.9
47	COC(=O)C1=CC=C2N=C(NC(=O)C3=CC=C(C=C3)C(=O)C3=CC=CC=C3)SC2=C1	7.8	16a
48	O=C(NC1=CC=C(C=C1)C(=O)C1=CC=CC=C1)C1=NC2=CC=CC=C2S1	0.01	9.0a
Figure 3
Compound	SMILES	IC50 H2122 (uM)	IC50 H2009 (uM)	IC50 H2018 (uM)
49	O=C(NC1=NC2=CC=C(OCC#C)C=C2S1)C1=CC=C(C=C1)C(=O)C1=CC=CC=C1	0.014	0.09
50	O=C(NC1=CC=C(C=C1)C(=O)NC1=NC2=CC=CC=C2S1)OCC#C	--
51	COC1=CC=C2N=C(NC(=O)C3=CC=C(C=C3)C(=O)C3=CC=C(OCC#C)C=C3)SC2=C1	0.13		31
52	O=C(NCC#C)C1=CC=C(C=C1)C(=O)NC1=NC2=CC=CC=C2S1	0.1		46
Table 4
Compound	SMILES	IC50 H2122 (uM)	IC50 H2122 + oleate (uM)	IC50 H2122 + HET0016 (uM)	IC50 H1155-vector (uM)	IC50 H1155-CYP4F11 (uM)
(R)-27	COC1=CC=C2N=C(NC(=O)C3=CC=C(C=C3)[C@H](N)C3=CC=CC=C3)SC2=C1	0.021	>50	0.18	2.1	0.027
(R)-53	N[C@H](C1=CC=CC=C1)C1=CC=C(C=C1)C(=O)NC1=NC2=CC=C(O)C=C2S1	0.008	>50	<0.010	0.009	0.02
(R)-54	N[C@H](C1=CC=CC=C1)C1=CC=C(C=C1)C(=O)NC1=NC2=CC=CC=C2S1	0.012	>50	0.011	6.7	1.2
